# Supplementary material
Source: Springer Nature journal article supplement (https://www.springermedizin.de/resource/supplementary/12887_2009_345_MOESM3_ESM.pdf/9474892)

Kaplan Meier Survival estimate

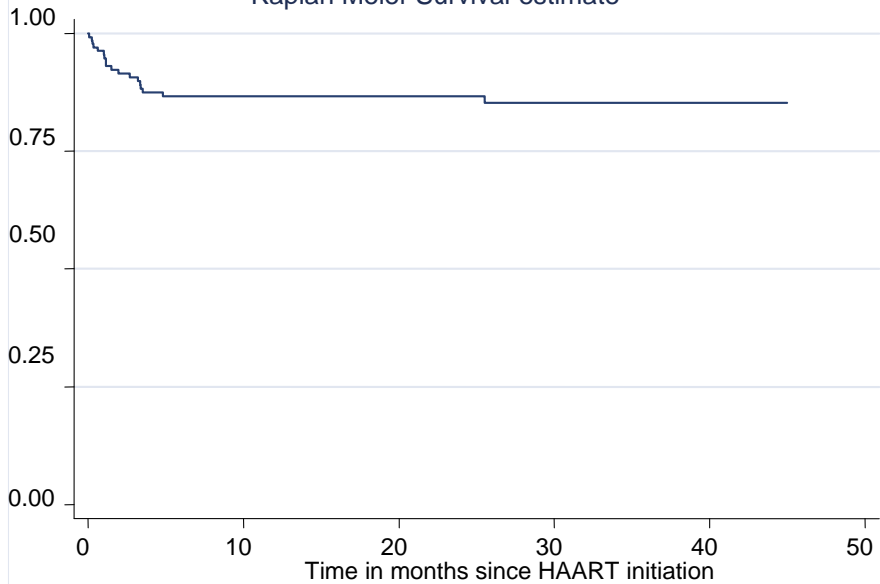

Proportion  
alive

Supplement: MOESM3 [file 9474892]
